# Supplementary material for: Differential Genetic Regulation of Canine Hip Dysplasia and Osteoarthritis
Source: PubMed Central journal article supplement (PMC2952589; doi:10.1371/journal.pone.0013219), 2010-10-11
Supplement: pone.0013219.s004.pdf [file pone.0013219.s004.pdf]

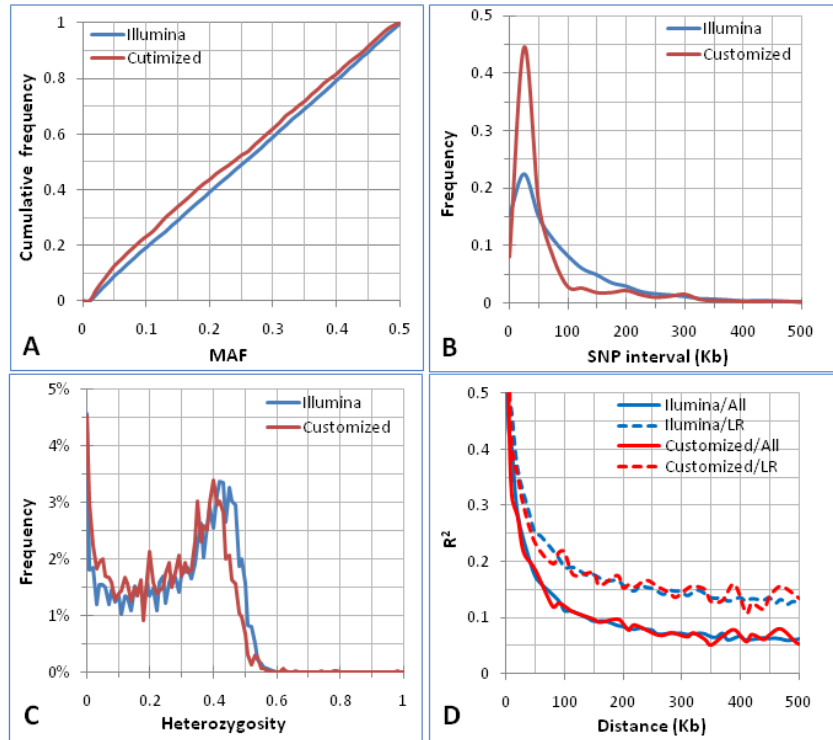

**Figure S4.** The properties of single nucleotide polymorphisms (SNPs). Dogs were genotyped with customized and Illumina arrays. A: Cumulative distribution of minor allele frequencies B: The density of the filtered SNPs; C: Distribution of heterozygosity; D: Linkage disequilibrium (LD) decay ( $R^2$ ) over physical distance. The LD was calculated with all breeds and all Labrador Retrievers (LR) respectively.
