# Supplementary material for: Differential Genetic Regulation of Canine Hip Dysplasia and Osteoarthritis
Source: PubMed Central journal article supplement (PMC2952589; doi:10.1371/journal.pone.0013219), 2010-10-11
Supplement: pone.0013219.s006.pdf [file pone.0013219.s006.pdf]

**Table S1.** Number of dogs categorized by breed, phenotype and SNP platforms.

| Breed                  | Hip dysplasia         |                         |         | Osteoarthritis        |                         |         |
|------------------------|-----------------------|-------------------------|---------|-----------------------|-------------------------|---------|
|                        | Illumina<br>SNP array | Customized<br>SNP array | Overlap | Illumina<br>SNP array | Customized<br>SNP array | Overlap |
| Labrador retriever     | 188                   | 288                     | 85      | 42                    | 14                      | 14      |
| Greyhound              | 7                     | 6                       | 6       | -                     | -                       | -       |
| LR × Greyhound<br>(F1) | 8                     | 5                       | 4       | 1                     |                         |         |
| F1×LR                  | 67                    | 47                      | 41      | 37                    | 21                      | 21      |
| F1×Greyhound           | 16                    | 19                      | 8       | 12                    | 7                       | 7       |
| (F1×LR) × (F1×LR)      | 12                    | 34                      | 11      | 7                     | 6                       | 6       |
| Golden retriever       | 15                    | 26                      | 2       | -                     | -                       | -       |
| German Shepherd        | 17                    | 56                      | 10      | -                     | -                       | -       |
| Newfoundland           | 18                    | 28                      | 16      | -                     | -                       | -       |
| Rottweiler             | 14                    | 23                      | 13      | -                     | -                       | -       |
| Bernese Mt. Dog        | 4                     | -                       | -       | -                     | -                       | -       |
| Border Collie          | -                     | 19                      | -       | -                     | -                       | -       |
| Total                  | 366                   | 551                     | 196     | 99                    | 48                      | 48      |

There were 721 (366+551-196) dogs genotyped with Illumina array, customized array or both (overlap). Each of the 721 dogs had a Hip dysplasia measurement (Norberg angle). Of these 721 dogs, 99 dogs had measurements on hip Osteoarthritis. LR= Labrador retriever, F1=Labrador retriever crossed with Greyhound.
