# Supplementary material for: Differential Genetic Regulation of Canine Hip Dysplasia and Osteoarthritis
Source: PubMed Central journal article supplement (PMC2952589; doi:10.1371/journal.pone.0013219), 2010-10-11
Supplement: pone.0013219.s007.pdf [file pone.0013219.s007.pdf]

**Table S2.** Distribution of Norberg Angle measurements (number of dogs).

| Norberg Angle (°) | Illumina Array | Customized array | Overlap | Total |
|-------------------|----------------|------------------|---------|-------|
| ~70               | 2              | 8                | 2       | 8     |
| 71~80             | 7              | 19               | 6       | 20    |
| 81~90             | 17             | 22               | 12      | 27    |
| 91~100            | 64             | 69               | 43      | 90    |
| 101~110           | 226            | 337              | 114     | 449   |
| 111~120           | 50             | 96               | 19      | 127   |
| Total             | 366            | 551              | 196     | 721   |

There were 721 dogs genotyped with the Illumina array, the customized array, or both (overlap). Each dog had a measurement on Norberg Angle which is a continuous trait ranging from ~50° (a subluxated hip) to ~120° (a phenotypically unaffected hip).
