# Supplementary material for: Differential Genetic Regulation of Canine Hip Dysplasia and Osteoarthritis
Source: PubMed Central journal article supplement (PMC2952589; doi:10.1371/journal.pone.0013219), 2010-10-11
Supplement: pone.0013219.s008.pdf [file pone.0013219.s008.pdf]

**Table S3.** Number of dogs with Norberg Angle measurements categorized by study population and SNP array.

| Population  | Illumina array | Customized array | Overlap | Total |
|-------------|----------------|------------------|---------|-------|
| Linkage     | 298            | 399              | 155     | 542   |
| Association | 263            | 446              | 132     | 577   |
| Overlap     | 195            | 294              | 91      | 398   |
| Total       | 366            | 551              | 196     | 721   |

There were 721 dogs genotyped with the Illumina array, the customized array or both (overlap). These dogs were from two populations (linkage and association). The linkage population included Labrador retrievers, Greyhounds and their crosses. The association population included eight purebreeds (Labrador retrievers, Greyhounds, German Shepherds, Newfoundlands, Golden retrievers, Rottweilers, Border Collies and Bernese Mountain Dogs).
